# Supplementary material
Source: MDPI journal article supplement (https://www.mdpi.com/2410-3888/8/4/201)
Supplement: s1 [file s1]

## Supplementary materials

**Table S1.** Primers used for the amplification in the mitochondrial genomes of *Saurogobio dabryi* and *S. punctatus* in this study.

| Primer              | Size (bp) | Annealing temperature (°C) | Primer sequence (5'-3')                                |
|---------------------|-----------|----------------------------|--------------------------------------------------------|
| <i>S. dabryi</i>    |           |                            |                                                        |
| Sd01                | 1977      | 58                         | F: TCGTGGCAGACATACTGATCC<br>R: TGGGTTGTGCCCATTGTC      |
| Sd02                | 434       | 57                         | F: CGCCAGGGTACTACGAGCAT<br>R: TTACGACTTGCCTCCCCTTG     |
| Sd03                | 1527      | 58                         | F: CAGCTTACCCTGTGAAGGCA<br>R: CCGCTTCTGCACGGATAGAT     |
| Sd04                | 1702      | 58                         | F: GAAAGGGAAGGAAGCTCGGCA<br>R: CAGGAGGGCAGCTTTGGTTA    |
| Sd05                | 1875      | 58                         | F: GGCCCTATCAAGCCTAGCAG<br>R: GGTACGGGTAAAAGGCCCA      |
| Sd06                | 1473      | 55                         | F: CCCTTGACCCAACCCTCTTA<br>R: AGCGCCTAAAATCGATGAAACA   |
| Sd07                | 1861      | 57                         | F: ACTAATGATCGGAGCGCCTG<br>R: TCGAAATTGGCCCCGGTGTA     |
| Sd08                | 1714      | 56                         | F: CCGTTCTGCCAGCTGTAATC<br>R: AGGCTCAGAAAAACCCGAGG     |
| Sd09                | 919       | 57                         | F: CCAAGCACACGCATTTCACA<br>R: TCAAAATGAGACGACGGCCA     |
| Sd10                | 411       | 58                         | F: AGCTGCTGCCTGATATTGACAC<br>R: GTTCCTGCTGGGTTGTGGAG   |
| Sd11                | 1825      | 57                         | F: TGGCCGTCGTCTCATTTTGA<br>R: ATCAGTTGTATAGGGCGGCG     |
| Sd12                | 1683      | 58                         | F: GGCTCCCTGCCACTTTTAGT<br>R: GACCAATATCCCCTGCTCGG     |
| Sd13                | 1418      | 57                         | F: GGGCGTCGGTATTATGTCCTT<br>R: GGGGGTTAAGTCGTGGTACTC   |
| Sd14                | 449       | 57                         | F: GTTGCCACCAAAGTCGACC<br>R: TGGGGAAGTCGTTCTGTTGC      |
| Sd15                | 1679      | 58                         | F: ACCCTGACCTTAGCCATCCT<br>R: CCGATGATGACGTAGGGGTG     |
| Sd16                | 421       | 58                         | F: TTTGCCTACGCCATCCTACG<br>R: GCCAGGGGTGGGAGTTAAAA     |
| <i>S. punctatus</i> |           |                            |                                                        |
| Sp01                | 1130      | 57                         | F: TCCTGGCATATGGTTACTGGTG<br>R: GGTGAGGTTTAAACGGGGGTT  |
| Sp02                | 1261      | 55                         | F: ACCCTAGCTGAAACAAACCG<br>R: GTGAGAAATGCTGCTGAGGTC    |
| Sp03                | 1449      | 59                         | F: CCCTCATCATCCAAACAGCCC<br>R: GTCTACGGATGCTCCGGCA     |
| Sp04                | 929       | 55                         | F: TCATTCTCATCCCCCTAGCAG<br>R: GACAAGGATAACAGGATTCGGTG |

**Table S2.** Characteristics of the mitochondrial genomes of two gudgeon species *S. dabryi*1-4 and *S. punctatus*.

| Gene /Element   | Position          |                   | Size (bp)      | Start codon | Termination codon | Amino acid | Anti-codon | Intergenic region <sup>a</sup> | Strand |
|-----------------|-------------------|-------------------|----------------|-------------|-------------------|------------|------------|--------------------------------|--------|
|                 | Start             | End               |                |             |                   |            |            |                                |        |
| <i>tRNA-Phe</i> | 1                 | 69                | 69             |             |                   |            | GAA        | 0                              | H      |
| <i>12S rRNA</i> | 70/70/69          | 1029/1028/1028    | 960/959/960    |             |                   |            |            | 2/2/1                          | H      |
| <i>tRNA-Val</i> | 1032/1031/1030    | 1103/1102/1102    | 72/72/73       |             |                   |            | TAC        | 0                              | H      |
| <i>16S rRNA</i> | 1104/1103/1103    | 2794/2790/2790    | 1691/1688/1688 |             |                   |            |            | 0                              | H      |
| <i>tRNA-Leu</i> | 2795/2791/2791    | 2870/2866/2866    | 76             |             |                   |            | TAA        | 0/1/1                          | H      |
| <i>ND1</i>      | 2871/2868/2868    | 3845/3842/3842    | 975            | ATG         | TAG/TAA/TAA       | 324        |            | 4                              | H      |
| <i>tRNA-Ile</i> | 3850/3847/3847    | 3921/3918/3918    | 72             |             |                   |            | GAT        | -2                             | H      |
| <i>tRNA-Gln</i> | 3920/3917/3917    | 3990/3987/3987    | 71             |             |                   |            | TTG        | 1                              | L      |
| <i>tRNA-Met</i> | 3992/3989/3989    | 4060/4057/4057    | 69             |             |                   |            | CAT        | 0                              | H      |
| <i>ND2</i>      | 4061/4058/4058    | 5107/5104/5104    | 1047           | ATG         | TAA               | 348        |            | -1                             | H      |
| <i>tRNA-Trp</i> | 5107/5104/5104    | 5177/5174/5174    | 71             |             |                   |            | TCA        | 2                              | H      |
| <i>tRNA-Ala</i> | 5180/5177/5177    | 5248/5245/5245    | 69             |             |                   |            | TGC        | 1                              | L      |
| <i>tRNA-Asn</i> | 5250/5247/5247    | 5322/5319/5319    | 73             |             |                   |            | GTT        | 1                              | L      |
| <i>OL</i>       | 5324/5321/5321    | 5354/5351/5351    | 31             |             |                   |            |            | -1                             |        |
| <i>tRNA-Cys</i> | 5354/5351/5351    | 5421/5418/5418    | 68             |             |                   |            | GCA        | 2                              | L      |
| <i>tRNA-Tyr</i> | 5424/5421/5421    | 5491/5488/5488    | 68             |             |                   |            | GTA        | 1                              | L      |
| <i>COXI</i>     | 5493/5490/5490    | 7043/7040/7040    | 1551           | GTG         | TAA               | 516        |            | 0                              | H      |
| <i>tRNA-Ser</i> | 7044/7041/7041    | 7114/7111/7111    | 71             |             |                   |            | TGA        | 3                              | L      |
| <i>tRNA-Asp</i> | 7118/7115/7115    | 7189/7186/7186    | 72             |             |                   |            | GTC        | 13                             | H      |
| <i>COXII</i>    | 7203/7200/7200    | 7893/7890/7890    | 691            | ATG         | T                 | 230        |            | 0                              | H      |
| <i>tRNA-Lys</i> | 7894/7891/7891    | 7969/7966/7966    | 76             |             |                   |            | TTT        | 1                              | H      |
| <i>ATP8</i>     | 7971/7968/7968    | 8135/8132/8132    | 165            | ATG         | TAA               | 54         |            | -7                             | H      |
| <i>ATP6</i>     | 8129/8126/8126    | 8812/8809/8809    | 684            | ATG         | TAA               | 227        |            | -1                             | H      |
| <i>COXIII</i>   | 8812/8809/8809    | 9596/9593/9591    | 785/785/783    | ATG         | TA                | 261        |            | -1                             | H      |
| <i>tRNA-Gly</i> | 9596/9593/9593    | 9666/9663/9663    | 71             |             |                   |            | TCC        | 0                              | H      |
| <i>ND3</i>      | 9667/9664/9664    | 10017/10014/10014 | 351            | ATG         | TAG               | 116        |            | -2                             | H      |
| <i>tRNA-Arg</i> | 10016/10013/10013 | 10085/10082/10082 | 70             |             |                   |            | TCG        | 0                              | H      |
| <i>ND4L</i>     | 10086/10083/10083 | 10382/10379/10379 | 297            | ATG         | TAA               | 98         |            | -7                             | H      |
| <i>ND4</i>      | 10376/10373/10373 | 11757/11754/11754 | 1382/1382/1383 | ATG         | TA/TA/TAG         | 460        |            | 0/0/-1                         | H      |
| <i>tRNA-His</i> | 11758/11755/11755 | 11827/11823/11823 | 70/69/69       |             |                   |            | GTG        | 0                              | H      |
| <i>tRNA-Ser</i> | 11828/11824/11824 | 11896/11892/11892 | 69             |             |                   |            | GCT        | -1                             | H      |
| <i>tRNA-Leu</i> | 11896/11892/11892 | 11968/11964/11964 | 73             |             |                   |            | TAG        | 0                              | H      |
| <i>ND5</i>      | 11969/11965/11965 | 13804/13800/13800 | 1836           | ATG         | TAA               | 611        |            | -4                             | H      |
| <i>ND6</i>      | 13801/13797/13797 | 14322/14318/14318 | 522            | ATG         | TAG               | 173        |            | 0                              | L      |
| <i>tRNA-Glu</i> | 14323/14319/14319 | 14391/14387/14387 | 69             |             |                   |            | TTC        | 4                              | L      |
| <i>Cyt b</i>    | 14396/14392/14392 | 15536/15532/15532 | 1141           | ATG         | T                 | 380        |            | 0                              | H      |
| <i>tRNA-Thr</i> | 15537/15533/15533 | 15608/15604/15604 | 72             |             |                   |            | TGT        | -1                             | H      |
| <i>tRNA-Pro</i> | 15608/15604/15604 | 15677/15673/15673 | 70             |             |                   |            | TGG        | 0                              | L      |
| <i>D-loop</i>   | 15678/15674/15674 | 16604/16601/16601 | 927/928/927    |             |                   |            |            | 0                              | H      |

<sup>a</sup>: Numbers correspond to the nucleotides separating adjacent genes, with a negative number indicating an overlap. Characteristics of the mitochondrial genomes of *S. dabryi* 1 and 2 are the same, while *S. dabryi* 3 and 4 are the same. The same information of mitogenomes of *S. punctatus*, *S. dabryi* 1 and 2, and *S. dabryi* 3 and 4 was displayed only once (e.g., position, size, etc.), and their different information was spaced by '/'. H represents the heavy strand; L represents the light strand.

**Table S3.** Likelihood ratio tests and parameter estimates under branch model for genes between *Gobiobotia* subgroup and *Pseudogobio* subgroup.

| Branch model            | Ln L          | Parameter estimates                      | df | 2Δln L   | LRT<br>P-value   |
|-------------------------|---------------|------------------------------------------|----|----------|------------------|
| <i>ND1</i>              |               |                                          |    |          |                  |
| M0 (one ratio)          | -13070.404278 | $\omega = 0.02117$                       | 95 |          |                  |
| two-ratio vs. one-ratio | -13070.287762 | $\omega_0 = 0.02123, \omega_1 = 0.01298$ | 96 | 0.23303  | 0.62928          |
| <i>ND2</i>              |               |                                          |    |          |                  |
| M0 (one ratio)          | -14976.612797 | $\omega = 0.05512$                       | 95 |          |                  |
| two-ratio vs. one-ratio | -14973.495841 | $\omega_0 = 0.05554, \omega_1 = 0.00010$ | 96 | 6.23391  | <b>0.01253*</b>  |
| <i>COXI</i>             |               |                                          |    |          |                  |
| M0 (one ratio)          | -15518.739888 | $\omega = 0.01328$                       | 95 |          |                  |
| two-ratio vs. one-ratio | -15517.368435 | $\omega_0 = 0.01342, \omega_1 = 0.00010$ | 96 | 2.74291  | 0.09769          |
| <i>COXII</i>            |               |                                          |    |          |                  |
| M0 (one ratio)          | -6930.292859  | $\omega = 0.02918$                       | 95 |          |                  |
| two-ratio vs. one-ratio | -6929.858710  | $\omega_0 = 0.02929, \omega_1 = 0.00010$ | 96 | 0.86830  | 0.35143          |
| <i>ATP8</i>             |               |                                          |    |          |                  |
| M0 (one ratio)          | -1675.341011  | $\omega = 0.08210$                       | 95 |          |                  |
| two-ratio vs. one-ratio | -1675.340997  | $\omega_0 = 0.08210, \omega_1 = 0.00010$ | 96 | 0.00008  | 0.99578          |
| <i>ATP6</i>             |               |                                          |    |          |                  |
| M0 (one ratio)          | -8503.534227  | $\omega = 0.03789$                       | 95 |          |                  |
| two-ratio vs. one-ratio | -8502.641000  | $\omega_0 = 0.03832, \omega_1 = 0.01142$ | 96 | 1.78645  | 0.18136          |
| <i>COXIII</i>           |               |                                          |    |          |                  |
| M0 (one ratio)          | -7836.226237  | $\omega = 0.01622$                       | 95 |          |                  |
| two-ratio vs. one-ratio | -7836.187618  | $\omega_0 = 0.01627, \omega_1 = 0.01225$ | 96 | 0.07724  | 0.78108          |
| <i>ND3</i>              |               |                                          |    |          |                  |
| M0 (one ratio)          | -4374.089883  | $\omega = 0.04266$                       | 95 |          |                  |
| two-ratio vs. one-ratio | -4372.192776  | $\omega_0 = 0.04350, \omega_1 = 0.00010$ | 96 | 3.79421  | 0.05143          |
| <i>ND4L</i>             |               |                                          |    |          |                  |
| M0 (one ratio)          | -3148.370909  | $\omega = 0.01633$                       | 95 |          |                  |
| two-ratio vs. one-ratio | -3147.816331  | $\omega_0 = 0.01658, \omega_1 = 0.00010$ | 96 | 1.10916  | 0.29227          |
| <i>ND4</i>              |               |                                          |    |          |                  |
| M0 (one ratio)          | -18170.870087 | $\omega = 0.03608$                       | 95 |          |                  |
| two-ratio vs. one-ratio | -18162.398440 | $\omega_0 = 0.03690, \omega_1 = 0.00010$ | 96 | 16.94329 | <b>0.00004**</b> |
| <i>ND5</i>              |               |                                          |    |          |                  |
| M0 (one ratio)          | -24859.463921 | $\omega = 0.05941$                       | 95 |          |                  |
| two-ratio vs. one-ratio | -24858.850342 | $\omega_0 = 0.05965, \omega_1 = 0.03116$ | 96 | 1.22716  | 0.26796          |
| <i>ND6</i>              |               |                                          |    |          |                  |
| M0 (one ratio)          | -7192.734989  | $\omega = 0.04308$                       | 95 |          |                  |
| two-ratio vs. one-ratio | -7190.171432  | $\omega_0 = 0.04366, \omega_1 = 0.00010$ | 96 | 5.12711  | <b>0.02355*</b>  |
| <i>Cyt b</i>            |               |                                          |    |          |                  |
| M0 (one ratio)          | -13607.932219 | $\omega = 0.01588$                       | 95 |          |                  |
| two-ratio vs. one-ratio | -13606.929245 | $\omega_0 = 0.01601, \omega_1 = 0.00010$ | 96 | 2.00595  | 0.15668          |

$\omega_1$  dN/dS value of foreground branch,  $\omega_0$  dN/dS value of background branch, significant difference LRT values displayed as bold.

**Table S4.** Likelihood ratio tests and parameter estimates under branch model for genes between *Saurogobio* tribe and *Pseudogobio* tribe.

| Branch model            | Ln L          | Parameter estimates                      | df | 2Δln L   | LRT<br>P-value   |
|-------------------------|---------------|------------------------------------------|----|----------|------------------|
| <i>ND1</i>              |               |                                          |    |          |                  |
| M0 (one ratio)          | -10226.236203 | $\omega = 0.02322$                       | 77 |          |                  |
| two-ratio vs. one-ratio | -10226.086036 | $\omega_0 = 0.02336, \omega_1 = 0.01652$ | 78 | 0.30033  | 0.58367          |
| <i>ND2</i>              |               |                                          |    |          |                  |
| M0 (one ratio)          | -11816.720079 | $\omega = 0.05169$                       | 77 |          |                  |
| two-ratio vs. one-ratio | -11816.485173 | $\omega_0 = 0.05200, \omega_1 = 0.03921$ | 78 | 0.46981  | 0.49307          |
| <i>COXI</i>             |               |                                          |    |          |                  |
| M0 (one ratio)          | -12439.962281 | $\omega = 0.01678$                       | 77 |          |                  |
| two-ratio vs. one-ratio | -12437.675806 | $\omega_0 = 0.01709, \omega_1 = 0.00010$ | 78 | 4.57295  | <b>0.03248*</b>  |
| <i>COXII</i>            |               |                                          |    |          |                  |
| M0 (one ratio)          | -5393.742869  | $\omega = 0.03296$                       | 77 |          |                  |
| two-ratio vs. one-ratio | -5391.320766  | $\omega_0 = 0.03422, \omega_1 = 0.00010$ | 78 | 4.84421  | <b>0.02774*</b>  |
| <i>ATP8</i>             |               |                                          |    |          |                  |
| M0 (one ratio)          | -1339.215153  | $\omega = 0.09622$                       | 77 |          |                  |
| two-ratio vs. one-ratio | -1335.289131  | $\omega_0 = 0.10294, \omega_1 = 0.00010$ | 78 | 7.85204  | <b>0.00508**</b> |
| <i>ATP6</i>             |               |                                          |    |          |                  |
| M0 (one ratio)          | -6575.914508  | $\omega = 0.04144$                       | 77 |          |                  |
| two-ratio vs. one-ratio | -6574.649547  | $\omega_0 = 0.04043, \omega_1 = 0.10905$ | 78 | 2.52992  | 0.11171          |
| <i>COXIII</i>           |               |                                          |    |          |                  |
| M0 (one ratio)          | -6142.780360  | $\omega = 0.01602$                       | 77 |          |                  |
| two-ratio vs. one-ratio | -6142.760513  | $\omega_0 = 0.01609, \omega_1 = 0.01346$ | 78 | 0.03969  | 0.84208          |
| <i>ND3</i>              |               |                                          |    |          |                  |
| M0 (one ratio)          | -3316.874050  | $\omega = 0.04635$                       | 77 |          |                  |
| two-ratio vs. one-ratio | -3316.825163  | $\omega_0 = 0.04664, \omega_1 = 0.03730$ | 78 | 0.09777  | 0.75452          |
| <i>ND4L</i>             |               |                                          |    |          |                  |
| M0 (one ratio)          | -2452.044738  | $\omega = 0.01830$                       | 77 |          |                  |
| two-ratio vs. one-ratio | -2451.398316  | $\omega_0 = 0.01718, \omega_1 = 0.03719$ | 78 | 1.29284  | 0.25552          |
| <i>ND4</i>              |               |                                          |    |          |                  |
| M0 (one ratio)          | -14262.679574 | $\omega = 0.03659$                       | 77 |          |                  |
| two-ratio vs. one-ratio | -14250.507866 | $\omega_0 = 0.03438, \omega_1 = 0.13475$ | 78 | 24.34342 | <b>0.00000**</b> |
| <i>ND5</i>              |               |                                          |    |          |                  |
| M0 (one ratio)          | -19625.971940 | $\omega = 0.05962$                       | 77 |          |                  |
| two-ratio vs. one-ratio | -19625.970971 | $\omega_0 = 0.05960, \omega_1 = 0.06051$ | 78 | 0.00194  | 0.96489          |
| <i>ND6</i>              |               |                                          |    |          |                  |
| M0 (one ratio)          | -5707.620951  | $\omega = 0.04103$                       | 77 |          |                  |
| two-ratio vs. one-ratio | -5707.320732  | $\omega_0 = 0.04066, \omega_1 = 0.07768$ | 78 | 0.60044  | 0.43841          |
| <i>Cyt b</i>            |               |                                          |    |          |                  |
| M0 (one ratio)          | -10671.529345 | $\omega = 0.01562$                       | 77 |          |                  |
| two-ratio vs. one-ratio | -10671.528422 | $\omega_0 = 0.01561, \omega_1 = 0.01602$ | 78 | 0.00185  | 0.96573          |

$\omega_1$  dN/dS value of foreground branch,  $\omega_0$  dN/dS value of background branch, significant difference LRT values displayed as bold.

**Table S5.** Likelihood ratio tests and parameter estimates under branch model for genes between *Saurogobio* branch A and *Saurogobio* branch B.

| Branch model            | Ln L         | Parameter estimates                      | df | 2Δln L  | LRT<br>P-value   |
|-------------------------|--------------|------------------------------------------|----|---------|------------------|
| <i>ND1</i>              |              |                                          |    |         |                  |
| M0 (one ratio)          | -3641.316842 | $\omega = 0.02468$                       | 23 |         |                  |
| two-ratio vs. one-ratio | -3638.250992 | $\omega_0 = 0.02787, \omega_1 = 0.00566$ | 24 | 6.13170 | <b>0.01328*</b>  |
| <i>ND2</i>              |              |                                          |    |         |                  |
| M0 (one ratio)          | -3806.798366 | $\omega = 0.04086$                       | 23 |         |                  |
| two-ratio vs. one-ratio | -3805.125359 | $\omega_0 = 0.04424, \omega_1 = 0.01697$ | 24 | 3.34602 | 0.06737          |
| <i>COXI</i>             |              |                                          |    |         |                  |
| M0 (one ratio)          | -4793.481054 | $\omega = 0.00614$                       | 23 |         |                  |
| two-ratio vs. one-ratio | -4793.047187 | $\omega_0 = 0.00675, \omega_1 = 0.00155$ | 24 | 0.86772 | 0.35159          |
| <i>COXII</i>            |              |                                          |    |         |                  |
| M0 (one ratio)          | -1993.069087 | $\omega = 0.02593$                       | 23 |         |                  |
| two-ratio vs. one-ratio | -1989.617875 | $\omega_0 = 0.03049, \omega_1 = 0.00010$ | 24 | 6.90242 | <b>0.00861**</b> |
| <i>ATP8</i>             |              |                                          |    |         |                  |
| M0 (one ratio)          | -487.999297  | $\omega = 0.01040$                       | 23 |         |                  |
| two-ratio vs. one-ratio | -487.993329  | $\omega_0 = 0.10497, \omega_1 = 0.08977$ | 24 | 0.01194 | 0.91299          |
| <i>ATP6</i>             |              |                                          |    |         |                  |
| M0 (one ratio)          | -2306.423393 | $\omega = 0.03557$                       | 23 |         |                  |
| two-ratio vs. one-ratio | -2301.548351 | $\omega_0 = 0.04238, \omega_1 = 0.00010$ | 24 | 9.75008 | <b>0.00179**</b> |
| <i>COXIII</i>           |              |                                          |    |         |                  |
| M0 (one ratio)          | -2498.814955 | $\omega = 0.01911$                       | 23 |         |                  |
| two-ratio vs. one-ratio | -2498.575447 | $\omega_0 = 0.02026, \omega_1 = 0.01195$ | 24 | 0.47902 | 0.48887          |
| <i>ND3</i>              |              |                                          |    |         |                  |
| M0 (one ratio)          | -1225.251294 | $\omega = 0.03817$                       | 23 |         |                  |
| two-ratio vs. one-ratio | -1225.142061 | $\omega_0 = 0.03925, \omega_1 = 0.02344$ | 24 | 0.21846 | 0.64022          |
| <i>ND4L</i>             |              |                                          |    |         |                  |
| M0 (one ratio)          | -921.854944  | $\omega = 0.01055$                       | 23 |         |                  |
| two-ratio vs. one-ratio | -921.047231  | $\omega_0 = 0.01247, \omega_1 = 0.00010$ | 24 | 1.61542 | 0.20373          |
| <i>ND4</i>              |              |                                          |    |         |                  |
| M0 (one ratio)          | -5130.798044 | $\omega = 0.03624$                       | 23 |         |                  |
| two-ratio vs. one-ratio | -5130.538317 | $\omega_0 = 0.03516, \omega_1 = 0.04494$ | 24 | 0.51944 | 0.47108          |
| <i>ND5</i>              |              |                                          |    |         |                  |
| M0 (one ratio)          | -6627.971808 | $\omega = 0.04967$                       | 23 |         |                  |
| two-ratio vs. one-ratio | -6625.941905 | $\omega_0 = 0.05270, \omega_1 = 0.02498$ | 24 | 4.05980 | <b>0.04392*</b>  |
| <i>ND6</i>              |              |                                          |    |         |                  |
| M0 (one ratio)          | -1963.919329 | $\omega = 0.04847$                       | 23 |         |                  |
| two-ratio vs. one-ratio | -1963.619015 | $\omega_0 = 0.05022, \omega_1 = 0.02959$ | 24 | 0.60062 | 0.43834          |
| <i>Cyt b</i>            |              |                                          |    |         |                  |
| M0 (one ratio)          | -3818.85911  | $\omega = 0.01710$                       | 23 |         |                  |
| two-ratio vs. one-ratio | -3816.21860  | $\omega_0 = 0.00463, \omega_1 = 0.01974$ | 24 | 5.28102 | <b>0.02156**</b> |

$\omega_1$  dN/dS value of foreground branch,  $\omega_0$  dN/dS value of background branch, significant difference LRT values displayed as bold.

**Table S6.** Likelihood ratio tests and parameter estimates under branch model for genes between *Abbottina* branch and *Pseudogobio* branch.

| Branch model            | Ln L          | Parameter estimates                      | df | 2Δln L   | LRT<br>P-value   |
|-------------------------|---------------|------------------------------------------|----|----------|------------------|
| <i>ND1</i>              |               |                                          |    |          |                  |
| M0 (one ratio)          | -7518.696299  | $\omega = 0.02193$                       | 53 |          |                  |
| two-ratio vs. one-ratio | -7517.808878  | $\omega_0 = 0.02127, \omega_1 = 0.03932$ | 54 | 1.77484  | 0.18278          |
| <i>ND2</i>              |               |                                          |    |          |                  |
| M0 (one ratio)          | -8944.606264  | $\omega = 0.05518$                       | 53 |          |                  |
| two-ratio vs. one-ratio | -8944.233752  | $\omega_0 = 0.05464, \omega_1 = 0.08174$ | 54 | 0.74502  | 0.38806          |
| <i>COXI</i>             |               |                                          |    |          |                  |
| M0 (one ratio)          | -9314.778132  | $\omega = 0.02153$                       | 53 |          |                  |
| two-ratio vs. one-ratio | -9294.747944  | $\omega_0 = 0.01682, \omega_1 = 0.10972$ | 54 | 40.06038 | <b>0.00000**</b> |
| <i>COXII</i>            |               |                                          |    |          |                  |
| M0 (one ratio)          | -4125.069803  | $\omega = 0.03616$                       | 53 |          |                  |
| two-ratio vs. one-ratio | -4111.124550  | $\omega_0 = 0.02904, \omega_1 = 0.29584$ | 54 | 27.89051 | <b>0.00000**</b> |
| <i>ATP8</i>             |               |                                          |    |          |                  |
| M0 (one ratio)          | -1010.913454  | $\omega = 0.10370$                       | 53 |          |                  |
| two-ratio vs. one-ratio | -1009.862737  | $\omega_0 = 0.09772, \omega_1 = 0.00010$ | 54 | 2.10143  | 0.14716          |
| <i>ATP6</i>             |               |                                          |    |          |                  |
| M0 (one ratio)          | -4894.718069  | $\omega = 0.04032$                       | 53 |          |                  |
| two-ratio vs. one-ratio | -4892.834453  | $\omega_0 = 0.03859, \omega_1 = 0.10655$ | 54 | 3.76723  | 0.05227          |
| <i>COXIII</i>           |               |                                          |    |          |                  |
| M0 (one ratio)          | -4471.979860  | $\omega = 0.01446$                       | 53 |          |                  |
| two-ratio vs. one-ratio | -4469.624864  | $\omega_0 = 0.01305, \omega_1 = 0.04798$ | 54 | 4.70999  | <b>0.02999*</b>  |
| <i>ND3</i>              |               |                                          |    |          |                  |
| M0 (one ratio)          | -2430.146856  | $\omega = 0.04978$                       | 53 |          |                  |
| two-ratio vs. one-ratio | -2430.140460  | $\omega_0 = 0.04959, \omega_1 = 0.05341$ | 54 | 0.01279  | 0.90995          |
| <i>ND4L</i>             |               |                                          |    |          |                  |
| M0 (one ratio)          | -1800.628248  | $\omega = 0.02048$                       | 53 |          |                  |
| two-ratio vs. one-ratio | -1800.627156  | $\omega_0 = 0.02054, \omega_1 = 0.01970$ | 54 | 0.00218  | 0.96273          |
| <i>ND4</i>              |               |                                          |    |          |                  |
| M0 (one ratio)          | -10309.086615 | $\omega = 0.03304$                       | 53 |          |                  |
| two-ratio vs. one-ratio | -10309.078653 | $\omega_0 = 0.03297, \omega_1 = 0.03457$ | 54 | 0.01592  | 0.89958          |
| <i>ND5</i>              |               |                                          |    |          |                  |
| M0 (one ratio)          | -14771.747150 | $\omega = 0.06229$                       | 53 |          |                  |
| two-ratio vs. one-ratio | -14771.214791 | $\omega_0 = 0.06292, \omega_1 = 0.04479$ | 54 | 1.06472  | 0.30214          |
| <i>ND6</i>              |               |                                          |    |          |                  |
| M0 (one ratio)          | -4212.686902  | $\omega = 0.03586$                       | 53 |          |                  |
| two-ratio vs. one-ratio | -4212.587061  | $\omega_0 = 0.03548, \omega_1 = 0.04541$ | 54 | 0.19968  | 0.65498          |
| <i>Cyt b</i>            |               |                                          |    |          |                  |
| M0 (one ratio)          | -7985.636450  | $\omega = 0.011473$                      | 53 |          |                  |
| two-ratio vs. one-ratio | -7978.701576  | $\omega_0 = 0.01304, \omega_1 = 0.06821$ | 54 | 13.86975 | <b>0.00020**</b> |

$\omega_1$  dN/dS value of foreground branch,  $\omega_0$  dN/dS value of background branch, significant difference LRT values displayed as bold.

**Table S7.** Likelihood ratio tests and parameter estimates under branch model for genes between *Pseudogobio* subbranch and *Biwia* complex subbranch.

| Branch model            | Ln L          | Parameter estimates                      | df | 2Δln L   | LRT<br>P-value   |
|-------------------------|---------------|------------------------------------------|----|----------|------------------|
| <i>ND1</i>              |               |                                          |    |          |                  |
| M0 (one ratio)          | -6335.605590  | $\omega = 0.01705$                       | 45 |          |                  |
| two-ratio vs. one-ratio | -6331.666605  | $\omega_0 = 0.01812, \omega_1 = 0.00010$ | 46 | 7.87797  | <b>0.00500**</b> |
| <i>ND2</i>              |               |                                          |    |          |                  |
| M0 (one ratio)          | -7451.713537  | $\omega = 0.04238$                       | 45 |          |                  |
| two-ratio vs. one-ratio | -7448.487509  | $\omega_0 = 0.04437, \omega_1 = 0.01449$ | 46 | 6.45206  | <b>0.01108*</b>  |
| <i>COXI</i>             |               |                                          |    |          |                  |
| M0 (one ratio)          | -7414.361712  | $\omega = 0.00324$                       | 45 |          |                  |
| two-ratio vs. one-ratio | -7413.365700  | $\omega_0 = 0.00349, \omega_1 = 0.00010$ | 46 | 1.99202  | 0.15813          |
| <i>COXII</i>            |               |                                          |    |          |                  |
| M0 (one ratio)          | -3159.454633  | $\omega = 0.00637$                       | 45 |          |                  |
| two-ratio vs. one-ratio | -3158.854110  | $\omega_0 = 0.00571, \omega_1 = 0.01530$ | 46 | 1.20105  | 0.27311          |
| <i>ATP8</i>             |               |                                          |    |          |                  |
| M0 (one ratio)          | -753.278370   | $\omega = 0.07171$                       | 45 |          |                  |
| two-ratio vs. one-ratio | -751.210852   | $\omega_0 = 0.07901, \omega_1 = 0.00010$ | 46 | 4.13504  | <b>0.04200*</b>  |
| <i>ATP6</i>             |               |                                          |    |          |                  |
| M0 (one ratio)          | -3942.486680  | $\omega = 0.01993$                       | 45 |          |                  |
| two-ratio vs. one-ratio | -3937.148100  | $\omega_0 = 0.02206, \omega_1 = 0.00010$ | 46 | 10.67716 | <b>0.00108**</b> |
| <i>COXIII</i>           |               |                                          |    |          |                  |
| M0 (one ratio)          | -3796.674702  | $\omega = 0.01084$                       | 45 |          |                  |
| two-ratio vs. one-ratio | -3794.849736  | $\omega_0 = 0.01169, \omega_1 = 0.00010$ | 46 | 3.64993  | 0.05607          |
| <i>ND3</i>              |               |                                          |    |          |                  |
| M0 (one ratio)          | -2015.242887  | $\omega = 0.03711$                       | 45 |          |                  |
| two-ratio vs. one-ratio | -2013.471095  | $\omega_0 = 0.04009, \omega_1 = 0.00752$ | 46 | 3.54358  | 0.05978          |
| <i>ND4L</i>             |               |                                          |    |          |                  |
| M0 (one ratio)          | -1484.739787  | $\omega = 0.01017$                       | 45 |          |                  |
| two-ratio vs. one-ratio | -1484.626002  | $\omega_0 = 0.00968, \omega_1 = 0.01714$ | 46 | 0.22757  | 0.63333          |
| <i>ND4</i>              |               |                                          |    |          |                  |
| M0 (one ratio)          | -8693.683271  | $\omega = 0.02845$                       | 45 |          |                  |
| two-ratio vs. one-ratio | -8693.542602  | $\omega_0 = 0.02878, \omega_1 = 0.02343$ | 46 | 0.28134  | 0.59583          |
| <i>ND5</i>              |               |                                          |    |          |                  |
| M0 (one ratio)          | -12520.054865 | $\omega = 0.05645$                       | 45 |          |                  |
| two-ratio vs. one-ratio | -12519.576542 | $\omega_0 = 0.05729, \omega_1 = 0.04483$ | 46 | 0.95665  | 0.32803          |
| <i>ND6</i>              |               |                                          |    |          |                  |
| M0 (one ratio)          | -3509.282412  | $\omega = 0.02552$                       | 45 |          |                  |
| two-ratio vs. one-ratio | -3509.273967  | $\omega_0 = 0.02565, \omega_1 = 0.02392$ | 46 | 0.01689  | 0.89660          |
| <i>Cyt b</i>            |               |                                          |    |          |                  |
| M0 (one ratio)          | -6758.273817  | $\omega = 0.00889$                       | 45 |          |                  |
| two-ratio vs. one-ratio | -6757.963837  | $\omega_0 = 0.00858, \omega_1 = 0.01307$ | 46 | 0.61996  | 0.43106          |

$\omega_1$  dN/dS value of foreground branch,  $\omega_0$  dN/dS value of background branch, significant difference LRT values displayed as bold.

**Table S8.** Parameter estimates and log-likelihood values under models among sites for *ND5* gene between *Abbottina* branch and *Pseudogobio* branch.

| Model | Ln L          | Estimates of parameters    |                         |                         | Model compared | LRT <i>P</i> -value | Positively selected sites                                        |
|-------|---------------|----------------------------|-------------------------|-------------------------|----------------|---------------------|------------------------------------------------------------------|
| M3    | -14458.922389 | p <sub>0</sub> =0.72050    | p <sub>1</sub> =0.23722 | p <sub>2</sub> =0.04228 | M0 vs. M3      | 0.00000             | []<br>Not Allowed                                                |
| M0    | -14785.592850 | ω <sub>0</sub> =0.00685    | ω <sub>1</sub> =0.15515 | ω <sub>2</sub> =0.61383 |                |                     |                                                                  |
| M2a   | -14592.358120 | p <sub>0</sub> =0.93540    | p <sub>1</sub> =0.06460 | p <sub>2</sub> =0.00000 | M1a vs. M2a    | 0.99999             | []<br>Not Allowed<br>30 D 0.896, 34 Q 0.972<br>*, 525 H 0.997 ** |
| M1a   | -14592.358111 | ω <sub>0</sub> =0.03877    | ω <sub>1</sub> =1.00000 | ω <sub>2</sub> =3.24359 |                |                     |                                                                  |
|       |               | p <sub>0</sub> =0.93540    | p <sub>1</sub> =0.06460 |                         |                |                     |                                                                  |
|       |               | ω <sub>0</sub> =0.03877    | ω <sub>1</sub> =1.00000 |                         |                |                     |                                                                  |
| M8    | -14467.224202 | p <sub>0</sub> =0.98091    | p <sub>1</sub> =0.19951 | q=2.23544               | M7 vs. M8      | 0.00000             | Not Allowed                                                      |
| M7    | -14499.292618 | (p <sub>1</sub> = 0.01909) | ω= 1.00000              |                         |                |                     |                                                                  |
| M8a   | -14467.224202 | p=0.20943                  | q=1.75932               |                         | M8a vs. M8     | 1.00000             | Not Allowed                                                      |
|       |               | p <sub>0</sub> =0.98091    | p=0.19951               | q=2.23541               |                |                     |                                                                  |
|       |               | (p <sub>1</sub> = 0.01909) | ω= 1.00000              |                         |                |                     |                                                                  |



**Table S9.** Parameter estimates and log-likelihood values under models among sites for *ND2*, *ND4*, and *ND5* genes between *Pseudogobio* subbranch and *Biwia* complex subbranch.

| Genes      | Model | Ln L          | Estimates of parameters |                    |                     | Model compared | LRT P-value | Positively selected sites                                         |
|------------|-------|---------------|-------------------------|--------------------|---------------------|----------------|-------------|-------------------------------------------------------------------|
| <i>ND2</i> |       |               | $p_0=0.86577$           | $p_1=0.13423$      | $p_2=0.00000$       |                |             |                                                                   |
|            | M3    | -7308.238087  | $\omega_0=0.01348$      | $\omega_1=0.25621$ | $\omega_2=64.42707$ |                |             | []                                                                |
|            | M0    | -7414.093565  |                         | $\omega_0=0.04379$ |                     | M0 vs. M3      | 0.00000     | Not Allowed                                                       |
|            |       |               | $p_0=0.97213$           | $p_1=0.02787$      | $p_2=0.00000$       |                |             |                                                                   |
|            | M2a   | -7333.751619  | $\omega_0=0.03069$      | $\omega_1=1.00000$ | $\omega_2=31.00040$ |                |             | []                                                                |
|            |       |               | $p_0=0.97213$           | $p_1=0.02787$      |                     | M1a vs. M2a    | 1.00000     | Not Allowed                                                       |
|            | M1a   | -7333.751619  | $\omega_0=0.03069$      | $\omega_1=1.00000$ |                     |                |             |                                                                   |
|            |       |               | $p_0=0.98539$           | $p_1=0.16621$      | $q=2.74693$         |                |             | 221 T 0.543, 237 S 0.623, 274 D 0.960 *, 277 A 0.631              |
| <i>ND4</i> | M8    | -7290.676459  | ( $p_1=0.01461$ )       | $\omega=1.00000$   |                     |                |             |                                                                   |
|            | M7    | -7318.842293  | $p=0.18332$             | $q=2.19708$        |                     | M7 vs. M8      | 0.00000     | Not Allowed                                                       |
|            |       |               | $p_0=0.98539$           | $p=0.16621$        | $q=2.74693$         |                |             |                                                                   |
|            | M8a   | -7290.676459  | ( $p_1=0.01461$ )       | $\omega=1.00000$   |                     | M8a vs. M8     | 0.99804     | Not Allowed                                                       |
|            |       |               | $p_0=0.91824$           | $p_1=0.07521$      | $p_2=0.00655$       |                |             |                                                                   |
|            | M3    | -8468.764243  | $\omega_0=0.00606$      | $\omega_1=0.26197$ | $\omega_2=1.16976$  |                |             | []                                                                |
|            | M0    | -8633.391256  |                         | $\omega_0=0.02861$ |                     | M0 vs. M3      | 0.00000     | Not Allowed                                                       |
|            |       |               | $p_0=0.95833$           | $p_1=0.04167$      | $p_2=0.00000$       |                |             |                                                                   |
| <i>ND5</i> | M2a   | -8518.424204  | $\omega_0=0.01256$      | $\omega_1=1.00000$ | $\omega_2=34.58410$ |                |             | []                                                                |
|            |       |               | $p_0=0.95833$           | $p_1=0.04167$      |                     | M1a vs. M2a    | 0.99999     | Not Allowed                                                       |
|            | M1a   | -8518.424203  | $\omega_0=0.01256$      | $\omega_1=1.00000$ |                     |                |             |                                                                   |
|            |       |               | $p_0=0.97983$           | $p_1=0.03903$      | $q=0.37962$         |                |             |                                                                   |
|            | M8    | -8493.093615  | ( $p_1=0.02017$ )       | $\omega=1.00000$   |                     |                |             | 26 A 0.975 *, 189 D 0.602                                         |
|            | M7    | -8521.337900  | $p=0.04116$             | $q=0.32453$        |                     | M7 vs. M8      | 0.00000     | Not Allowed                                                       |
|            |       |               | $p_0=0.97983$           | $p=0.03849$        | $q=0.37107$         |                |             |                                                                   |
|            | M8a   | -8493.093599  | ( $p_1=0.02017$ )       | $\omega=1.00000$   |                     | M8a vs. M8     | 0.99549     | Not Allowed                                                       |
| <i>ND5</i> |       |               | $p_0=0.85138$           | $p_1=0.14862$      | $p_2=0.00000$       |                |             |                                                                   |
|            | M3    | -12304.348203 | $\omega_0=0.01534$      | $\omega_1=0.32130$ | $\omega_2=57.22185$ |                |             | []                                                                |
|            | M0    | -12534.632508 |                         | $\omega_0=0.05744$ |                     | M0 vs. M3      | 0.00000     | Not Allowed                                                       |
|            |       |               | $p_0=0.94188$           | $p_1=0.04465$      | $p_2=0.01347$       |                |             |                                                                   |
|            | M2a   | -12366.032902 | $\omega_0=0.03359$      | $\omega_1=1.00000$ | $\omega_2=1.00000$  |                |             | []                                                                |
|            |       |               | $p_0=0.94188$           | $p_1=0.05812$      |                     | M1a vs. M2a    | 1.00000     | Not Allowed                                                       |
|            | M1a   | -12366.032902 | $\omega_0=0.03359$      | $\omega_1=1.00000$ |                     |                |             | 30 K 0.819, 34 P 0.952 *, 277 E 0.553, 525 S 0.988 *, 526 L 0.667 |
|            |       |               | $p_0=0.97416$           | $p_1=0.19584$      | $q=2.69821$         |                |             |                                                                   |
| <i>ND5</i> | M8    | -12299.346989 | ( $p_1=0.02584$ )       | $\omega=1.00000$   |                     |                |             |                                                                   |
|            | M7    | -12332.341160 | $p=0.20253$             | $q=1.79323$        |                     | M7 vs. M8      | 0.00000     | Not Allowed                                                       |
|            |       |               | $p_0=0.97416$           | $p=0.19584$        | $q=2.69826$         |                |             |                                                                   |
|            | M8a   | -12299.346988 | ( $p_1=0.02584$ )       | $\omega=1.00000$   |                     | M8a vs. M8     | 0.99887     | Not Allowed                                                       |
